1 **Physiology-Based Electrocardiographic Criteria for Left Bundle Branch Capture**

2 Marek Jastrzębski MD, PhD<sup>1</sup> (1), Grzegorz Kiełbasa MD<sup>1</sup>, Karol Curila, MD, PhD<sup>2</sup>, Paweł  
3 Moskal MD, PhD<sup>1</sup>, Agnieszka Bednarek MD, PhD<sup>1</sup>, Marek Rajzer, MD, PhD<sup>1</sup>, Pugazhendhi  
4 Vijayaraman, MD, FHRS<sup>3</sup>

5

6 (1) First Department of Cardiology, Interventional Electrophysiology and Hypertension,  
7 Jagiellonian University, Medical College, Krakow, Poland

8 (2) Department of Cardiology, Third Faculty of Medicine, Charles University and  
9 University Hospital Kralovske Vinohrady, Prague, Czech Republic

10 (3) Geisinger Heart Institute, Geisinger Commonwealth School of Medicine, Wilkes-  
11 Barre, PA, USA

12

13 Short title: **ECG criteria for left bundle branch capture**

14

15 The Journal Subject Term - Electrophysiology

16

17

18

19

20 Corresponding author:

21 Prof. Marek Jastrzębski, MD, PhD

22 First Department of Cardiology,

23 Interventional Electrophysiology and Hypertension,

24 Jagiellonian University,

25 Jakubowskiego 2, 30-688 Kraków, Poland.

26 Phone: 048-502545228;

27 Email: [mcjastrz@cyf-kr.edu.pl](mailto:mcjastrz@cyf-kr.edu.pl)

28

1 **Abstract**

2 *Background:* During left bundle branch (LBB) area pacing, it is important to confirm that the  
3 capture of the LBB is achieved, not just the capture of only the adjacent left ventricular  
4 myocardium (LV septal capture). Our aim was to establish ECG criteria for LBB capture by  
5 analyzing ECGs with confirmed LBB capture and non-capture. We hypothesized that since  
6 LBB pacing results in physiologic depolarization of the left ventricle then the native QRS can  
7 serve as a reference for the diagnosis of LBB capture in the same patient.

8 *Methods:* Only patients with direct evidence of LBB capture (output-dependent or  
9 refractoriness-dependent QRS morphology transition) were included. Several QRS  
10 characteristics were compared between the native rhythm and different types of LBB area  
11 capture. Receiver-operator characteristics analysis was performed to determine the optimal  
12 V6 R-wave peak time (RWPT) cut-off for LBB diagnosis.

13 *Results:* A total of 357 ECG tracing (124 patients) were analyzed: 118 with native rhythm,  
14 124 with non-selective LBB capture, 69 with selective LBB capture and 46 with LV septal  
15 capture. Our hypotheses that during LBB capture the paced V6 RWPT (measured from QRS  
16 onset) equals the native V6 RWPT and that the paced V6 RWPT (measured from the  
17 stimulus) equals the LBB potential to V6 R-wave peak interval were positively validated.  
18 Criteria based on these rules had sensitivity and specificity of 98.0–88.2% and 85.7–95.4%,  
19 respectively. The optimal and 100% specific V6 RWPT values for differentiation between  
20 LBB capture and LV septal capture in patients with narrow QRS / right bundle branch block  
21 were 83 ms and 74 ms, respectively; while in patients with left bundle branch  
22 block/asystole/ventricular escape the optimal and 100% specific V6 RWPT values were 101  
23 ms and 80 ms, respectively.

1 *Conclusions:* Novel criteria for LBB capture were developed and optimal V6 RWPT cut-offs  
2 were determined.

3

4 Key Words: left bundle branch pacing; ECG criteria; R-wave peak time.

5

1 **What this study adds**

2

3 ● We showed that LBB pacing truly reproduce the physiological depolarization of the  
4 left ventricle since the paced V6 RWPT equals the native conduction V6 RWPT.

5 ● Individualized LBB capture criteria, that use the native QRS as a reference, were  
6 developed.

7 ● The optimal V6 RWPT values for differentiation between LBB capture and LV septal  
8 capture were determined, separately for patients with healthy and diseased LBB.

9

## 1        **Introduction**

2            Left bundle branch (LBB) pacing is rapidly developing into a promising pacing  
3        technique with potential for application in both conventional pacing and heart failure  
4        patients.<sup>1,3</sup> During LBB pacing, it is important to confirm that the capture of the LBB is  
5        achieved, not just the capture of only the adjacent left ventricular septal myocardium (LV  
6        septal pacing).

7            Although a few ECG criteria (QRS duration, V6 R-wave peak time (RWPT)) for LBB  
8        capture were proposed to differentiate between non-selective (ns) LBB pacing and LV septal  
9        pacing, these are arbitrary and were never validated, with unknown sensitivity and  
10       specificity.<sup>1-5</sup>

11           Using dynamic ECG maneuvers with output-dependent and refractoriness-dependent  
12        QRS morphological changes as the 'gold standard' for LBB capture diagnosis (Supplemental  
13        Figures 1 and 2),<sup>1,4</sup> it should be possible to precisely characterize various types of LBB area  
14        paced QRS complexes. This could serve to develop/validate ECG criteria for differentiation  
15        between LBB capture vs. LV septal capture.

16           Moreover, we believe that since conduction system pacing results in physiological  
17        depolarization of the left ventricle, then the native QRS complex parameters in a patient could  
18        be used as a reference to assess if the paced QRS complex in the same patient is compatible  
19        with physiological depolarization of the left ventricle. On the basis of this, the following  
20        specific research hypotheses were formulated:

21        1.) Capture of the LBB can be diagnosed when the paced V6 RWPT (measured from the  
22        QRS onset) equals the V6 RWPT during native non-LBBB rhythm - Figure 1.

1 2.) Capture of the LBB can be diagnosed when the paced V6 RWPT (measured from the  
2 stimulus) equals the LBB potential to the V6 R-wave peak interval during native non-LBBB  
3 rhythm - Figure 2.

4 3.) Capture of the LBB in a patient with LBBB can be diagnosed when the paced V6 RWPT  
5 is shorter than the native V6 intrinsicoid deflection time (IDT) by more than the transseptal  
6 conduction time (TCT) - Figure 3.

7

## 8 **Aim**

9 Our aim was to establish new ECG criteria for diagnosis of LBB capture and to  
10 determine diagnostically optimal cut-off for V6 RWPT.

11

## 12 **Methods**

13 The data that support the findings of this study are available from the corresponding  
14 author upon reasonable request.

## 15 Population

16 Patients who underwent LBB pacing device implantation for bradycardia and/or heart  
17 failure indications in two centers were screened. The LBB implantation procedure was  
18 described by us and others elsewhere.<sup>1-7</sup> In order to develop LBB capture criteria, only  
19 patients with direct evidence of capture of the LBB were included in the study. Such a  
20 situation was considered to be the case when there was QR/rSR' paced QRS morphology in  
21 lead V1, with at least one of the following three conditions fulfilled:

22 1. Transition from ns-LBB to selective (s)-LBB capture was observed during  
23 decrease in pacing output.

1           2. Transition from ns-LBB to LV septal pacing was observed during decrease in  
2           pacing output.

3           3. Transition from ns-LBB to s-LBB capture was observed during programmed  
4           stimulation and/or rapid pacing.

5

## 6    Definitions and measurements

7           In every studied patient, each available paced QRS type (s-LBB, ns-LBB and LV  
8    septal) as well as QRS during the native rhythm – supraventricular and/or escape – was  
9    measured. The following QRS characteristics were obtained:

- 10           1.) Global QRS duration
- 11           2.) V6 RWPT
- 12           3.) LBB potential to QRS onset interval
- 13           4.) LBB potential to V6 R-wave peak interval
- 14           5.) V6 IDT – only in patients with LBBB
- 15           6.) TCT – only in patients with LBBB

16           Global QRS duration, as well as V6 RWPT, was measured using two methods: from  
17    the pacing artifact and from the QRS onset, i.e. without the pacing artifact and the initial  
18    latency (Figure 1). To allow for some imprecisions in measurement, a 10-ms difference  
19    between the native conduction interval and the corresponding interval during pacing was  
20    permitted.

21           In patients with LBBB, the V6 IDT was measured instead of the V6 RWPT, because  
22    in LBBB morphology the peak time and the IDT are usually not equivalent. The IDT was  
23    measured from the earliest QRS onset in any surface lead (global method), not to the point of  
24    the highest amplitude, but to the end of the slur/plateau in QRS, that is to the beginning of the

1 final rapid downsloping phase of R wave in lead V6 (Figure 3). In cases with monophasic  
2 QRS in V6 (a smooth descent from the peak to the end), the beginning of the final rapid  
3 downsloping phase in V5, I, and/or aVL were used.

4 TCT was measured using the endocardial signal from the pacing lead implanted in the  
5 LBB area and the surface ECG. TCT was considered equal to the time interval from the  
6 earliest QRS onset in any surface lead to the endocardial indication of the arrival of the  
7 depolarization wavefront to the LBB area. This was indicated by the first rapid change of  
8 endocardial signal polarity or velocity – usually it is the first spiky peak/nadir, but  
9 occasionally the first rapid acceleration of the endocardial signal (Figure 3). To avoid  
10 mistakes in choosing the right component of the often multicomponent endocardial signal, it  
11 has to be coincident (+/- 15 ms) with the very beginning of the first notch/slur/plateau in the  
12 lateral leads, preferably leads I and aVL, as their vectors record the septal activation more  
13 globally than the unipolar V6 that is far from the septum (Figure 3).

14 Every implantation procedure was recorded on the digital electrophysiological system  
15 (LabsystemPRO, Boston Scientific, USA). To ensure high precision, the measurements were  
16 performed using all 12 surface ECG leads recorded simultaneously, digital calipers, fast  
17 sweep speed (200 mm/s), and appropriate signal augmentation. At least three QRS complexes  
18 were measured and their values averaged.

19 All patients gave written informed consent for participation in this study and the  
20 Institutional Bioethical Committee approved the study protocol.

## 21 Statistical analysis

22 Continuous variables are presented as means and standard deviations. The distribution  
23 of the QRS and lead V6 RWPT was estimated by the kernel method. Categorical variables are  
24 presented as percentages. Differences between groups were assessed using the Fisher exact



1 test for a 2 x 2 table or Student's t-test, as appropriate. The performance of binary decision  
2 rules was described using sensitivity (SN) and specificity (SP). The performance of the QRS  
3 duration and V6 RWPT in discriminating between ns-HB and RV pacing was assessed using  
4 the receiver operating characteristic curve (ROC). Statistical analyses were performed in R.  
5 P-values < 0.05 were considered statistically significant.

6

## 7 **Results**

### 8 Population

9 A total of 468 patients with LBB area pacing from two centers were screened, and 124  
10 cases with certain diagnosis of LBB capture were included in the final analysis. In the  
11 excluded patients, the LBB diagnosis was based on some arbitrary criteria,<sup>1,5</sup> but could not be  
12 confirmed with dynamic QRS morphological changes. The basic clinical characteristics of the  
13 included patients is presented in Table 1. A total of 357 ECG tracings were analyzed: 118  
14 with native rhythm, 124 with ns-LBB capture, 69 with s-LBB capture and 46 with LV septal  
15 capture.

16

### 17 Novel criteria for diagnosis of LBB capture in non-LBBB patients

18 In the subgroup of 100 non-LBBB patients (after excluding LBBB, LBBB-type escape  
19 and asystole cases), a total of 290 ECG tracings were analyzed: 100 with native rhythm, 100  
20 with ns-LBB capture, 55 with s-LBB capture and 35 with LV septal capture.

21 The correlation between the native V6 RWPT and the ns-LBB paced V6 RWPT  
22 (without latency) was strong:  $r = 0.73$ ,  $p < 0.01$  (Figure 4). These two measures were nearly

1 equal, with an average difference of 2.7 ms ( $47.7 \pm 9.6$  ms vs.  $45.0 \pm 10.4$  ms). The average  
2 latency between the stimulus and the QRS onset was  $31.3 \pm 4.6$  ms.

3 Similarly, the correlation between the LBB potential to V6 R-wave peak interval and  
4 the V6 RWPT measured for the stimulus was strong:  $r = 0.87$ ,  $p < 0.01$  (Figure 4). The  
5 average difference between them was 3.5 ms ( $69.9 \pm 10.7$  ms vs.  $73.4 \pm 11.0$  ms). The average  
6 potential to QRS interval was  $22 \pm 7.0$  ms.

7 The criterion of "paced V6 RWPT (measured from QRS onset)  $\leq$  native V6 RWPT  
8 (+10ms)" correctly diagnosed ns-LBB capture in 98/100 patients with ns-LBB capture and  
9 misdiagnosed ns-LBB in 3/35 patients with LV septal pacing. This resulted in SN of 98.0%  
10 and SP of 85.7% for the diagnosis of LBB capture.

11 In this subgroup, 68 (68%) patients had LBB potential recorded. The criterion of  
12 "paced V6 RWPT (measured from stimulus)  $\leq$  LBB potential to V6 R-wave peak interval  
13 (+10 ms)" correctly diagnosed ns-LBB capture in 60/68 of patients with ns-LBB capture and  
14 misdiagnosed ns-LBB capture in 1/22 patients with LV septal pacing. This resulted in SN of  
15 88.2% and SP of 95.4% for the diagnosis of LBB capture.

16 There was no difference between ns-LBB and s-LBB paced QRS with regard to V6  
17 RWPT when measured from the stimulus or from the QRS onset:  $74.7 \pm 12.0$  ms vs.  $74.4$   
18  $\pm 13.0$  ms ( $p = 0.63$ ) and  $43.6 \pm 9.5$  ms vs.  $43.2 \pm 10.8$  ms ( $p = 0.67$ ), respectively.

19

#### 20 Novel criteria for diagnosis of LBB capture in LBBB patients

21 A total of 18 patients with LBBB were analyzed. In 12/18 patients transition to s-LBB  
22 capture was observed, in 8/18 transition to LV septal capture was observed, and in 12/18 a  
23 selective response during programmed stimulation was observed (in several patients two or all

1 three phenomena were present). In patients with LBBB, the average TCT was  $63.0 \pm 8.2$  ms  
2 and the average IDT was  $128 \pm 16.8$  ms. The LV septal paced V6 RWPT (measured from  
3 QRS onset) was closely approximated by the difference  $IDT - TCT$  ( $71.4 \pm 11.4$  ms vs.  $66.0$   
4  $\pm 12.4$ , ms,  $p = 0.19$ ). The ns-LBB paced V6 RWPT (measured from QRS onset) was, in 14/18  
5 cases, shorter by  $> 10$  ms than the difference  $IDT - TCT$ , while the LV septal paced V6  
6 RWPT (measured from QRS onset) in 8/18 was equal to, or longer or shorter by less than 10  
7 ms than, the difference  $IDT - TCT$ . Consequently, the criterion of “paced V6 RWPT +10 ms  
8  $< (IDT - TCT)$ ” had SN and SP, for the diagnosis of LBB capture in patients with LBBB, of  
9 77.8% and 100%, respectively.

10 In 4/18 LBBB patients, intraprocedural mechanical trauma to the right bundle branch  
11 resulted in a complete transient atrioventricular block and emergence of an escape rhythm of  
12 RBBB morphology. In all these cases, the criterion of “paced V6 RWPT (measured from QRS  
13 onset)  $\leq$  native V6 RWPT (+10ms)” was fulfilled.

14

#### 15 Distribution of V6 RWPT values during different types of capture and optimal cut-offs

16 There was a difference in observed V6 RWPT values between patients with normal  
17 LBB conduction (narrow/RBBB QRS) and patients with diseased LBB  
18 (LBBB/NIVCD/escape/asystole), both when V6 RWPT was measured for the QRS onset or  
19 from the pacing stimulus:  $42.5 \pm 8.9$  ms vs  $51.5 \pm 11.3$  ms ( $p < 0.0001$ ) and  $73.3 \pm 9.6$  ms vs  
20  $84.2 \pm 13.5$  ms ( $p < 0.0001$ ), respectively.

21 The distribution of V6 RWPT (measured from the pacing stimulus) in narrow  
22 QRS/RBBB patients, during ns-LBB and LV septal capture, together with the ROC curves, is  
23 presented in Figure 5. The average increase in V6 RWPT with loss of LBB capture was  $20.0$   
24  $\pm 6.4$  ms. The optimal V6 RWPT value for differentiation between LBB capture and LV

1 septal capture was 83 ms (SN of 84.7% and SP of 96.3%). V6 RWPT value of <74 ms had SP  
2 for LBB capture diagnosis of 100%.

3 The distribution of V6 RWPT (measured from the pacing stimulus) in patients with  
4 LBBB/NIVCD/escape/asystole, during ns-LBB and LV septal capture, together with the ROC  
5 curves, is presented in Figure 5. The average increase in V6 RWPT with loss of LBB capture  
6 was  $21.2 \pm 7.5$  ms. The optimal V6 RWPT value for differentiation between LBB capture and  
7 LV septal capture was 101 ms (SN of 90.4% and SP of 78.9%). V6 RWPT value of  $\leq 80$  ms  
8 had specificity for LBB capture diagnosis of 100%.

9

#### 10 QRS duration

11 The average QRS durations for native QRS, ns-LBB QRS, s-LBB QRS and LV septal  
12 QRS are presented in Tables 1 and 2. There was a nearly complete overlap of QRS duration  
13 values between different ns-LBB capture and LV septal pacing, eliminating QRS duration as  
14 a useful parameter for the diagnosis of LBB capture (Figure 6).

15

#### 16 **Discussion**

17 The major finding of this study is that LBB capture resulted in the maintenance or  
18 restoration of the physiological activation time of the lateral wall of the LV. This was  
19 expressed by the equality of the paced V6 RWPT to the V6 RWPT during native LBB  
20 activation, and allowed us to formulate novel criteria for LBB capture.

21 The second important result of the study is the establishment of the optimal cut-off  
22 values of V6 RWPT for diagnosis of LBB capture in patients with healthy and with diseased  
23 LBB on the basis of a sizable sample of ECGs with confirmed LBB capture/non-capture.

1

2 Individualized paced V6 R-wave peak time for the diagnosis of LBB capture

3         The V6 RWPT, in case of monophasic, single peak R wave, corresponds to the  
4 intrinsicoid deflection time in lead V6. This measure represents the time it takes for the  
5 depolarization wavefront to reach the epicardial surface of the lateral wall of the LV.<sup>8</sup> During  
6 normal native conduction, the V6 RWPT depends on the conduction in the LBB and not on  
7 the RBB conduction. We hypothesized, that since during LBB capture, the activation of the  
8 lateral wall of the LV follows the physiological route, then the paced V6 RWPT should be  
9 identical as V6 RWPT during native conduction. In contrast, if LBB is not captured and only  
10 LV septal myocardial capture is present, then the activation of the lateral wall of the LV  
11 should be delayed by the time it takes for the myocardial depolarization wavefront to reach  
12 the Purkinje network–myocardium interface (usually 15–25 ms) and the paced V6 RWPT  
13 should be longer than the native V6 RWPT. The individualized V6 RWPT criterion approach  
14 is applicable to patients in whom QRS resulting from native LBB conduction can be observed  
15 (i.e. any non-LBB type QRS), either of the supraventricular or even escape origin. From our  
16 experience, this is possible in > 80% of patients referred for device implantation.

17         The most precise application of the above principle is comparing the stimulus to V6 R-  
18 wave peak interval with LBB potential to V6 R-wave peak interval. This study showed that  
19 during LBB capture, these two intervals were nearly identical. The pacing stimulus  
20 depolarizes the LBB at the site of the recorded potential and the activation pathways to the  
21 lateral wall of the LV are the same, with the post stimulus latency in LV depolarization equal  
22 to the latency between LBB potential and QRS onset.

23         This method might be inaccurate when the recorded potential is not the main LBB  
24 potential but a potential from a more distal LBB subdivision. Then, the activation pathway

1 during pacing will not be the same but will be slightly longer by the time it takes for  
2 retrograde conduction from the point of capture to the main LBB. We observed such a  
3 situation in 9% of our patients (see supplementary materials).

4 When the LBB is not recorded, the V6 RWPT can be measured alternatively - directly  
5 from the QRS onset rather than from the pacing stimulus, thus omitting both the initial latency  
6 and the LBB potential to QRS interval. Our results showed that LBB capture can be  
7 diagnosed very accurately using this method.

8

9 Fixed cut-off value for V6 R-wave peak time for the diagnosis of LBB capture

10 We have shown previously that during His bundle pacing, the V6 RWPT values  
11 showed typical bell-curve distribution with a significant overlap of values with those of  
12 myocardial pacing.<sup>9</sup> Consequently, we assumed that a similar situation might be present  
13 during LBB pacing and that a fixed V6 RWPT was unlikely to be both specific and sensitive  
14 for the diagnosis of LBB capture. The current study confirmed this (Figures 4 and 5), showing  
15 that, during LBB capture, the V6 RWPT (measured from the pacing stimulus) could be even  
16 > 100 ms long, while, very rarely, LV septal pacing could result in V6 RWPT < 75 ms.  
17 Nevertheless, if a fixed V6 RWPT criterion is preferred, then the ROC curve analysis (Figures  
18 4 and 5) pointed to the values 83 ms and 101 ms (measured from the pacing stimulus) as  
19 having an optimal balance of specificity and sensitivity for patients with normal and diseased  
20 LBB, respectively.

21 If a firm intraprocedural diagnosis of LBB capture was desired, then the cut-off values  
22 of 74 ms and 80 ms were 100% specific for LBB capture in patients with normal and diseased  
23 LBB, respectively. This corroborates and specifies the cut-off values (70, 80, and 90 ms)

1 proposed arbitrarily by others previously.<sup>2,4-6</sup> We believe that the currently established firm  
2 cut-offs might have substantial practical importance for the LBB area lead implanters.

3

#### 4 LBB capture in patients with LBBB

5 We hypothesized that LV septal pacing eliminates only the transseptal conduction  
6 delay, while LBB capture also mitigates the intra-LV delay. The V6 IDT was shown to  
7 correspond with the arrival of local myocardial depolarization to the area under the lead V6.<sup>8</sup>  
8 In patients with LBBB, the V6 IDT is prolonged due to the transseptal conduction delay and  
9 the non-physiological conduction within the LV. The presence of a pacing lead in the LBB  
10 area facilitates the determination of the TCT because the arrival of the depolarization  
11 wavefront to the other side of the septum can be precisely recorded. During LV septal pacing,  
12 the V6 IDT (equivalent to the paced RWPT) is shortened only by the elimination of the  
13 transseptal conduction delay. If the paced V6 RWPT is shorter than the native IDT by more  
14 than just the 'bypassed' TCT, then it must be related to the complete or partial restoration of  
15 the physiological intra-LV conduction, which is possible only via recruitment of the LBB by  
16 the pacing stimulus.

17 Apart from the above method, the LBB capture in patients with LBBB can be  
18 occasionally diagnosed using the criterion for non-LBBB patients (native V6 RWPT = paced  
19 V6 RWPT). This is possible when a narrow or RBBB-type QRS appears either during the  
20 escape rhythm (22% of cases in the current study) or possibly during high-output His bundle  
21 pacing.

#### 22 Clinical translation

23 There is a consensus in the electrophysiological community involved with conduction  
24 system pacing research on the urgent need to establish consistent, precise and evidence-based,

1 rather than arbitrary, criteria for differentiating between LBB pacing and LV septal  
2 myocardial pacing. Currently, the only available methods that can firmly ascertain the  
3 diagnosis of LBB capture are invasive (based on the mapping of His–Purkinje system  
4 activity) or require dynamic maneuvers (output-dependent and programmed LBB stimulation-  
5 induced paced QRS morphology change). The applicability of these methods to LBB capture  
6 diagnosis is limited for practical reasons and/or due to their low diagnostic sensitivity. In  
7 contrast, the currently developed criteria are based on ECG analysis, are very sensitive and  
8 are also applicable during ambulatory device follow-up.

9         Moreover, we demonstrated that the ECG criteria for LBB capture are deeply rooted in  
10 the normal physiology of heart depolarization. Perhaps the conduction system paced QRS  
11 should be viewed/assessed using the well-known normal values and criteria developed for the  
12 assessment of a non-paced QRS complex. For example, the average paced V6 RWPT in  
13 patients with LBBB, despite LBB capture, was longer than in cases with narrow QRS or  
14 RBBB. In addition, non-physiological paced V6 RWPT values (i.e. > 60 ms when measured  
15 from the QRS onset) were observed during LBB capture nearly only in patients with LBBB,  
16 NIVCD and asystole/escape rhythm cases, i.e. patients with very diseased left ventricular  
17 conduction systems. This suggests that despite LBB capture, some residual, but possibly  
18 clinically important, intra-LV conduction disturbance remains. In patients with indications for  
19 cardiac resynchronization therapy, such persistence of QRS features of LBBB in the paced  
20 ECG could be viewed as an indication to add a coronary sinus lead to achieve a more  
21 complete correction of the LBBB physiology. If during LV septal pacing, despite the lack of  
22 LBB capture, the paced QRS shows normal V6 RWPT (i.e. < 50 ms when measured from the  
23 QRS onset), probably resulting from a very early penetration to a healthy distal LBB, then it  
24 should be viewed as a physiological pacing as well. Notably, the 100% specific cut-off values  
25 of V6 RWPT established by this study (74–80 ms when measured from stimulus) closely



1 correspond with the known upper limit of normal values for V6 IDT (50ms) + the post-  
2 stimulus latency interval of 30 ms.

### 3 Limitations

4 This study was based on data from two centers and the results might not be universally  
5 applicable due to population and implantation technique differences.

6 The individualized approach to LBB criteria might be limited when the beginning of  
7 the ns-LBB paced QRS cannot be determined precisely in cases with signal oversaturation  
8 post pacing stimulus extending beyond the latency interval.

9 It seems that during rS morphology, the V6 RWPT is shortened by cancellation forces  
10 and probably less accurately reflects the timing of the local depolarization wavefront.  
11 Consequently, discordant morphology, i.e. when there is R/Rs in V6 during pacing and rS  
12 during native rhythm, might lead to a false negative result (see supplementary material).

13

### 14 Conclusions

15 LBB pacing is a method of physiological pacing and can be recognized in the ECG on  
16 the basis of physiology-based criteria proposed in this study. Native QRS is a powerful  
17 reference to the diagnosis of LBB capture during LBB area pacing. It is on this basis that  
18 these novel and accurate criteria for LBB capture have been developed. It seems warranted to  
19 study further if normal values developed for the non-paced QRS complex can be used to  
20 diagnose/assess normal depolarization/electrical synchrony during LBB area pacing.

21

### 22 **Funding**

1 This paper was partially supported by the Charles University Research Program Q38,  
2 Research Centre program No. UNCE/MED/002, 260530/SVV/2020

3

#### 4 **Disclosures**

5 Dr. Vijayaraman has received research and fellowship support as well as speaker and  
6 consultant fees from Medtronic. He has also received consultant fees from Abbott, Biotronik,  
7 Eaglepoint LLC and Boston Scientific. Dr. Jastrzebski has received consultant fees and other  
8 honoraria from Medtronic. Dr. Curila has received consultant fees and proctoring honoraria  
9 from Medtronic. Dr. Moskal has received consultant fees from Medtronic. The other authors  
10 report no conflicts.

11

#### 12 **References**

- 13 1. Huang W, Chen X, Su L, Wu S, Xia X, Vijayaraman P. A beginner's guide to  
14 permanent left bundle branch pacing. *Heart Rhythm*. 2019; 16:1791-6.
- 15 2. Vijayaraman P, Sundaram S, Cano O et al. Left Bundle Branch Pacing for Cardiac  
16 Resynchronization Therapy: Results from International LBBP Collaborative Study  
17 Group. *J Am.Coll.Cardiol EP*. 2020. *In press*
- 18 4. Vijayaraman P, Subzposh FA, Naperkowski A et al. Prospective evaluation of  
19 feasibility and electrophysiologic and echocardiographic characteristics of left bundle  
20 branch area pacing. *Heart Rhythm*. 2019; 16:1774-82.
- 21 3. Jastrzebski M, Moskal P, Bednarek A et al. Programmed deep septal stimulation: A  
22 novel maneuver for the diagnosis of left bundle branch capture during permanent  
23 pacing. *J Cardiovasc Electrophysiol*. 2020;31:485-93.

- 1        5. Ponnusamy SS, Arora V, Namboodiri N, Kumar V, Kapoor A, Vijayaraman P. Left  
2        bundle branch pacing: A comprehensive review. *J Cardiovasc Electrophysiol.* 2020;  
3        31:2462-73.
- 4        6. Zhang J, Wang Z, Zu L et al. Simplifying Physiological Left Bundle Branch Area  
5        Pacing Using a New Nine-Partition Method. *Can J Cardiol.* 2020;  
6        doi.org/10.1016/j.cjca.2020.05.011
- 7        7. Jastrzebski M, Kiełbasa G, Moskal P et al. Fixation beats - a novel marker for  
8        reaching the left bundle branch area during deep septal lead implantation. *Heart*  
9        *Rhythm.* 2020; *In press*
- 10       8. Perez-Riera AR, de Abreu LC, Barbosa-Barros R, Nikus KC, Baranchuk A. R-Peak  
11       Time: An Electrocardiographic Parameter with Multiple Clinical Applications. *Ann*  
12       *Noninvasive Electrocardiol.* 2016; 21:10-9.
- 13       9. Jastrzebski M, Moskal P, Curila K et al. Electrocardiographic characterization of non-  
14       selective His-bundle pacing: validation of novel diagnostic criteria. *Europace.* 2019;  
15       21:1857-64.
- 16

1 **Figures**

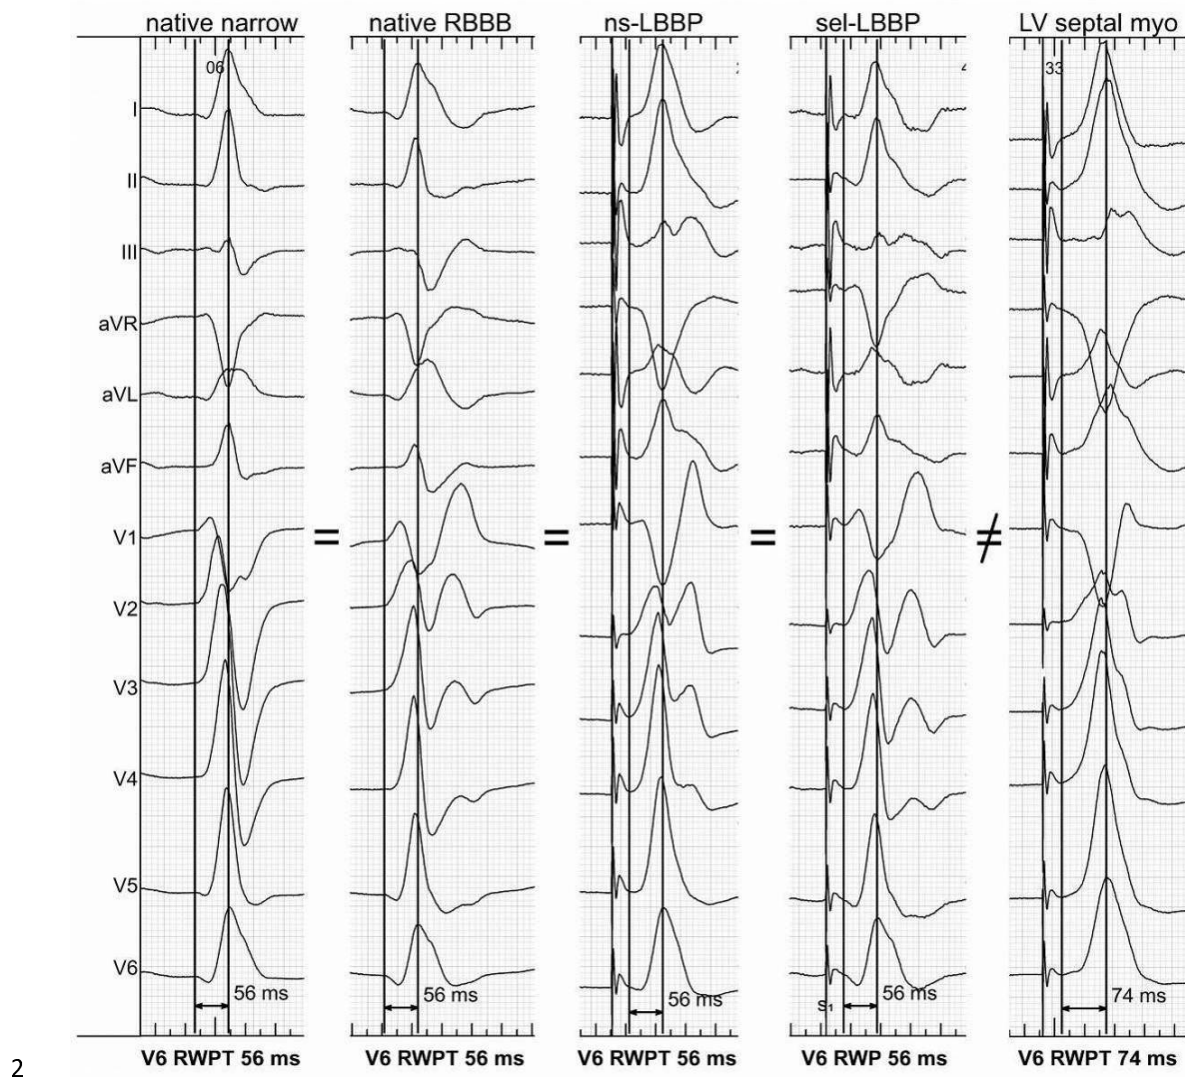

3 **Figure 1.** Five types of QRS complexes were obtained in the same patient. The R wave peak  
4 time in lead V6 (V6 RWPT) remained the same during the activation of the left bundle branch  
5 (LBB) via either intrinsic rhythm with narrow QRS or right bundle branch block (RBBB), or  
6 via pacing, either with non-selective LBB pacing (ns-LBBP) or selective LBB pacing (sel-  
7 LBBP). However, the V6 RWPT was evidently longer without the LBB capture, i.e. during  
8 left ventricular septal myocardial (LV septal myo) pacing.

9





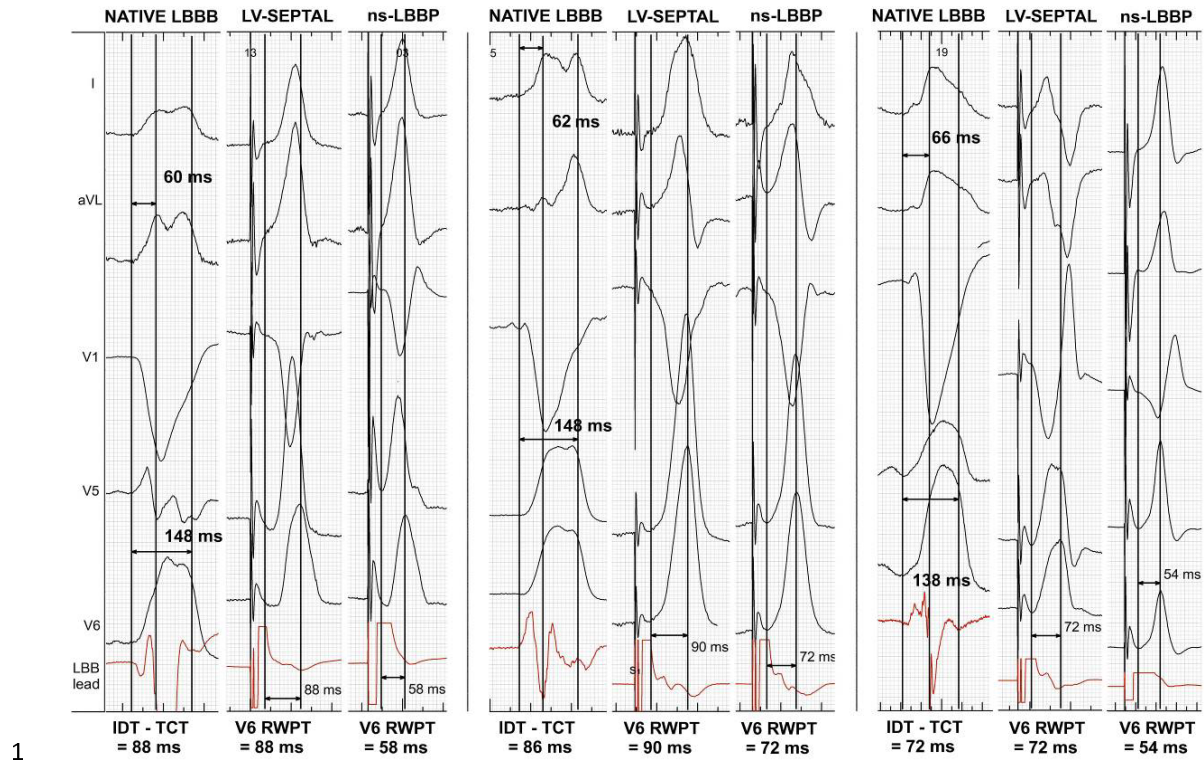

1

2 **Figure 3.** Three cases of the left bundle branch block (LBBB) corrected with non-selective  
3 left bundle branch pacing (ns-LBBP). The V6 RWPT during ns-LBBP was shorter than the  
4 V6 RWPT during left ventricular septal myocardial pacing (LV septal) that served as a  
5 reference for diagnosis of LBB capture. The V6 RWPT of LV septal pacing can be  
6 approximated by subtracting the transseptal conduction time (TCT) from the intrinsicoid  
7 deflection time (IDT).

8

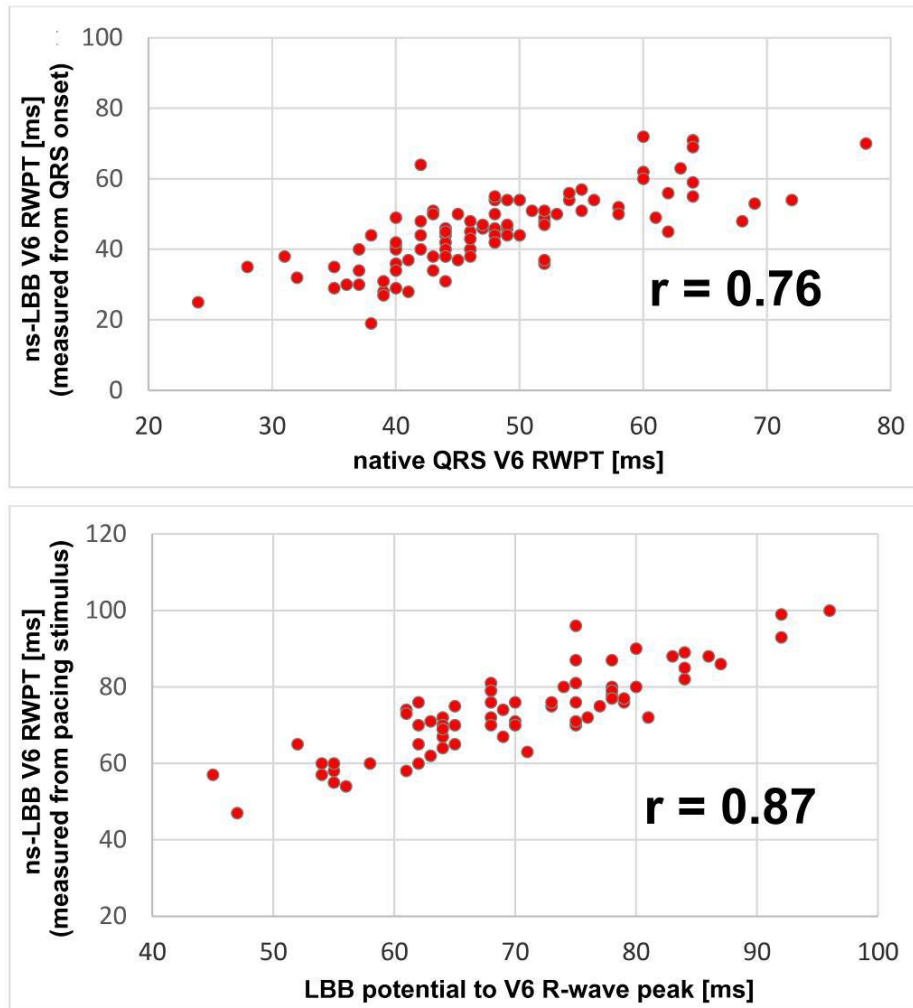

1

2 **Figure 4.** Correlation between native QRS parameters (x) and paced QRS parameters (y).

3 Upper panel: correlation between the native and the non-selective (ns) left bundle branch

4 (LBB) paced V6 R wave peak time (RWPT) measured from the QRS onset. Lower panel:

5 correlation between LBB potential to R-wave peak in V6 and V6 RWPT measured from the

6 pacing stimulus.

7

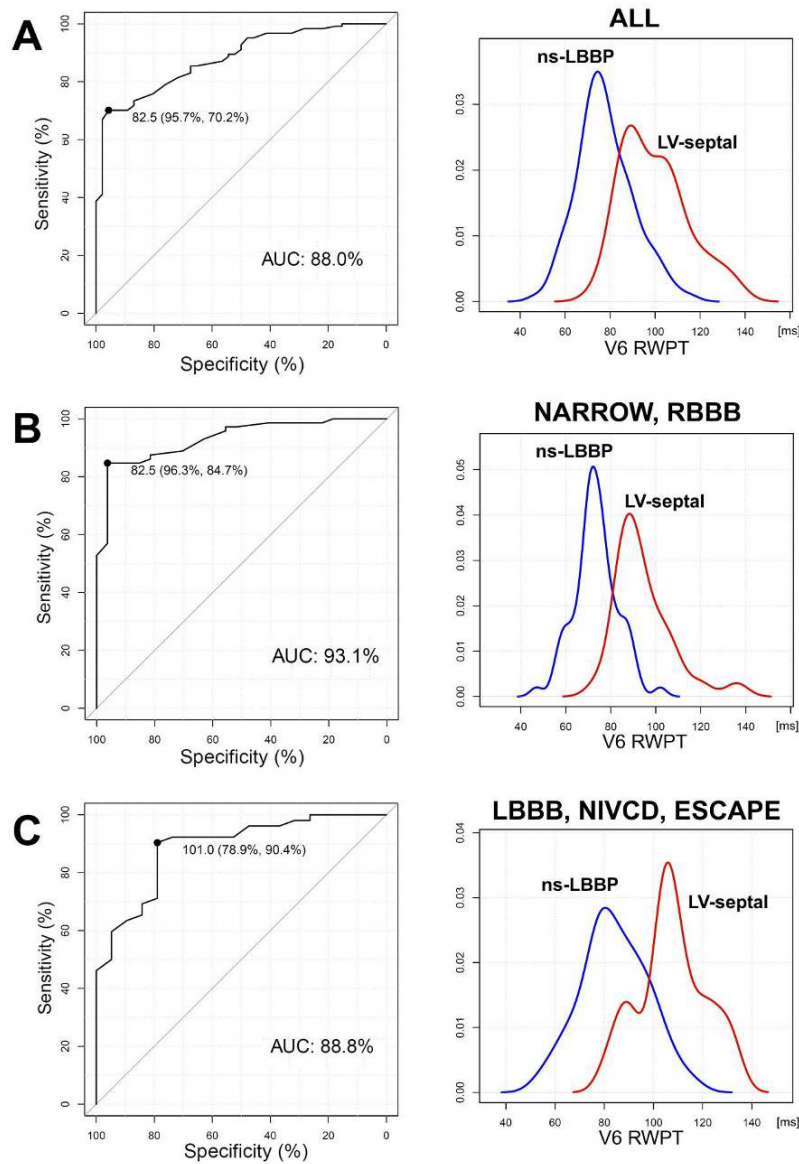

1

2 **Figure 5.** Receiver operating characteristic curves for lead V6 RWPT and the distribution of  
3 V6 RWPT values during non-selective left bundle branch pacing (ns-LBBP) and left  
4 ventricular septal myocardial pacing (LV septal). Panel A: data for the whole studied group.  
5 Panel B: data for the patients with narrow QRS or right bundle branch block (RBBB) QRS.  
6 Panel C: data for patients with left bundle branch block (LBBB), non-specific intraventricular  
7 conduction disturbance (NIVCD) or escape rhythm/asystole (ESCAPE). In all cases, the V6  
8 RWPT was measured from the stimulus onset.



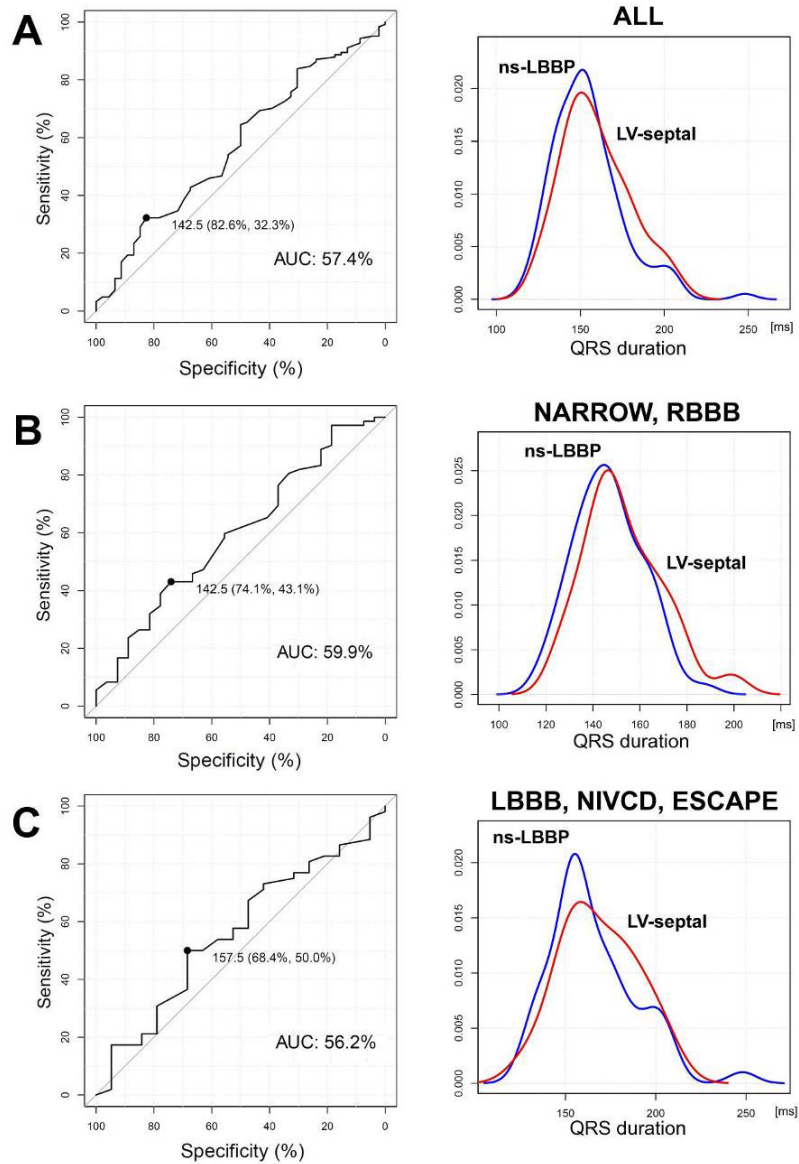

1

2 **Figure 6.** Receiver operating characteristic curves for lead QRS duration and the distribution  
3 of QRS duration values during non-selective left bundle branch pacing (ns-LBBP) and left  
4 ventricular septal myocardial pacing (LV septal). Panel A: data for the whole studied group.  
5 Panel B: data for the patients with narrow QRS or right bundle branch block (RBBB) QRS.  
6 Panel C: data for patients with left bundle branch block (LBBB), non-specific intraventricular  
7 conduction disturbance (NIVCD) or escape rhythm/asystole (ESCAPE). In all cases, QRS  
8 was measured from the stimulus onset.

9

## 1 Tables

2 **Table 1.** Basic characteristics of the studied group (n = 124)

|                                               |              |
|-----------------------------------------------|--------------|
| Age [years]                                   | 74.7 ± 11.4  |
| Male gender                                   | 71 (57.3%)   |
| Pacing indication [n]:                        |              |
| • Sick sinus syndrome                         | 32 (25.8%)   |
| • Atrioventricular block                      | 41 (33.1%)   |
| • Atrial fibrillation with bradycardia        | 13 (10.5%)   |
| • Heart failure                               | 38 (30.6%)   |
| Comorbidities [n]:                            |              |
| • Diabetes mellitus                           | 49 (39.5%)   |
| • Coronary heart disease                      | 51 (41.1%)   |
| • Heart failure                               | 59 (47.6%)   |
| • Hypertension                                | 99 (79.8%)   |
| • Severe valvular disease                     | 16 (12.9%)   |
| Left ventricular ejection fraction [%]        | 46.2 ± 15.5  |
| Left ventricular end-diastolic dimension [mm] | 53.0 ± 8.7   |
| Native QRS duration [ms]                      | 133.6 ± 34.8 |
| Native QRS type:                              |              |
| • Narrow                                      | 39 (31.6%)   |
| • LAFB                                        | 5 (4.0%)     |
| • RBBB                                        | 13 (10.5%)   |
| • RBBB + LAFB/LPFB                            | 15 (12.1%)   |
| • NIVCD                                       | 15 (12.1%)   |
| • LBBB                                        | 18 (14.5%)   |
| • Escape with RBBB-type QRS                   | 13 (10.5%)   |
| • Escape with LBBB-type QRS                   | 2 (1.6%)     |
| • Complete asystole (paced)                   | 4 (3.2%)     |

3 RBBB – right bundle branch block; LAH – left anterior fascicular block; LPH – left posterior  
 4 fascicular block; LBBB – left bundle branch block; NIVCD – non-specific intraventricular  
 5 conduction disturbance.

1 **Table 2.** Pacing- and procedure-related characteristics

| n = 124                         |              |
|---------------------------------|--------------|
| LBB capture diagnosis based on: |              |
| • Transition to s-LBBP @TT      | 68 (54.8%)   |
| • Transition to ns-LBBP @TT     | 48 (38.7%)   |
| • Selective response @PS        | 77 (62.1%)   |
| LBB potential observed          | 70 (56.4%)   |
| LBB potential to QRS onset [ms] | 22.7 ± 6.0   |
| Acute ventricular sensing [mV]  | 8.6 ± 4.7    |
| Acute LBB capture threshold [V] | 0.81 ± 0.4   |
| Non-selective LBB QRS [ms]*     | 122.9 ± 19.6 |
| Non-selective LBB QRS [ms] †    | 154.5 ± 21.2 |
| Selective LBB QRS [ms]*         | 144.5 ± 24.4 |
| Selective LBB QRS [ms] †        | 175.8 ± 26.5 |
| LV septal QRS [ms]*             | 127.2 ± 19.5 |
| LV septal QRS [ms] †            | 159.3 ± 20.2 |
| Fluoroscopy time [min]          | 11.4 ± 9.3   |
| Type of implanted device:       |              |
| • DDD/VVI pacemaker             | 93 (75.0%)   |
| • CRT device                    | 31 (25.0%)   |

2 LBB – left bundle branch; @TT – at threshold test; @PS – at programmed stimulation

3 \* – measured from the true QRS onset

4 † – measured from the pacing stimulus onset
